# Supplementary material for: Bulk Milk Tank Samples Are Suitable to Assess Circulation of Tick-Borne Encephalitis Virus in High Endemic Areas
Source: MDPI journal article supplement (doi:10.3390/v13091772), 2021-09-05
Supplement: s1 [file s1]

**Table S1.** Milk amount per bulk tank in tested farms. 1–4—sheep farms; 5–21—goat farms. Data on farm ID referring to the map in Figure 1 are not provided due to personal data protection.

|    | Milk amount<br>per bulk tank<br>(liters) | Number of<br>animals per<br>farm | Number of<br>TBEV<br>positive<br>samples | TBEV viral load (log <sub>10</sub> copies/mL) |     |     |
|----|------------------------------------------|----------------------------------|------------------------------------------|-----------------------------------------------|-----|-----|
|    |                                          |                                  |                                          | Mean                                          | Min | Max |
| 1  | 2.4                                      | 4                                | 2                                        | 4.1                                           | 3.5 | 4.7 |
| 2  | 1.8                                      | 3                                | 8                                        | 4.3                                           | 2.3 | 5.5 |
| 3  | 6                                        | 10                               | 4                                        | 3.0                                           | 2.0 | 4.1 |
| 4  | 28.2                                     | 47                               | 0                                        |                                               |     |     |
| 5  | 21                                       | 15                               | 4                                        | 2.3                                           | 1.8 | 3.1 |
| 6  | 11.2                                     | 8                                | 10                                       | 3.7                                           | 3.2 | 4.3 |
| 7  | 56                                       | 40                               | 1                                        | 2.2                                           |     |     |
| 8  | 12.6                                     | 9                                | 8                                        | 2.8                                           | 1.8 | 4.1 |
| 9  | 11.2                                     | 8                                | 6                                        | 3.1                                           | 2.0 | 4.2 |
| 10 | 19.6                                     | 14                               | 3                                        | 2.0                                           | 1.8 | 2.2 |
| 11 | 5.6                                      | 4                                | 0                                        |                                               |     |     |
| 12 | 4.2                                      | 3                                | 7                                        | 4.4                                           | 3.4 | 5.5 |
| 13 | 77                                       | 55                               | 0                                        |                                               |     |     |
| 14 | 84                                       | 60                               | 1                                        | 2.5                                           |     |     |
| 15 | 8.4                                      | 6                                | 5                                        | 2.6                                           | 1.9 | 4.1 |
| 16 | 28                                       | 20                               | 4                                        | 3.0                                           | 2.4 | 3.3 |
| 17 | 224                                      | 160                              | 0                                        |                                               |     |     |
| 18 | 30.8                                     | 22                               | 4                                        | 3.0                                           | 2.1 | 3.5 |
| 19 | 77                                       | 55                               | 0                                        |                                               |     |     |
| 20 | 8.4                                      | 6                                | 4                                        | 4.2                                           | 3.4 | 4.6 |
| 21 | 11.2                                     | 8                                | 1                                        | 3.1                                           |     |     |

<sup>1</sup> Approximate amount of milk from one milking.

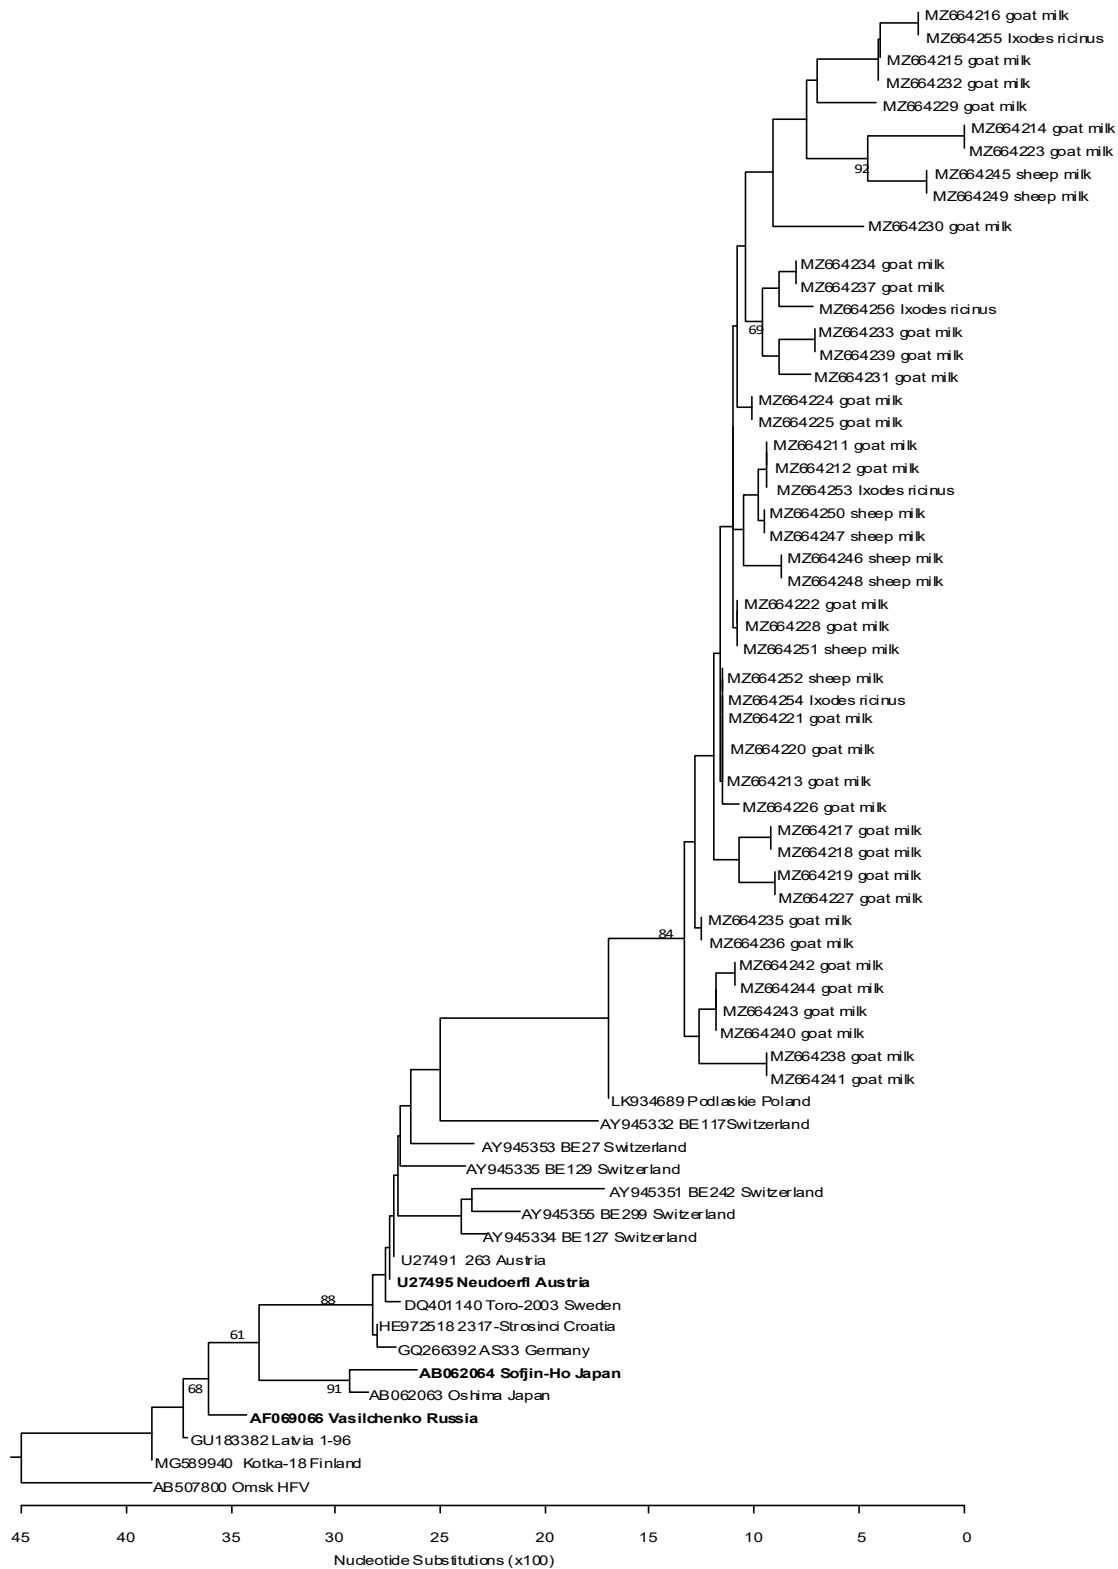

**Figure. S1.** Phylogenetic tree of the obtained TBEV sequences based on NCR genome fragment. The Omsk hemorrhagic fever virus was used as an outgroup. Names of the sequences indicates Accession Numbers in GenBank.
